# Supplementary material for: Micron- and nanosized FAU-type zeolites from fly ash for antibacterial applications
Source: Royal Society of Chemistry journal article supplement (doi:10.1039/c2jm33180b), 2012-01-01
Supplement: c2jm33180b.pdf [file c2jm33180b.pdf]

# Supporting Information

Micron- and nano-sized FAU-type zeolites from fly ash for antibacterial  
applications

*Lubomira Tosheva,<sup>\*,†</sup> Ava Brockbank,<sup>†</sup> Boriana Mihailova,<sup>‡</sup> Justyna Sutula,<sup>†</sup> Joachim Ludwig,<sup>‡</sup>  
Herman Potgieter,<sup>†</sup> and Joanna Verran<sup>†</sup>*

<sup>†</sup>Faculty of Science and Engineering, Manchester Metropolitan University, Chester Street,  
Manchester, M1 5GD, United Kingdom

<sup>‡</sup>Mineralogisch-Petrographisches Institut, Universität Hamburg, Grindelallee 48, D-20146  
Hamburg, Germany

\*CORRESPONDING AUTHOR, E-mail: [l.tosheva@mmu.ac.uk](mailto:l.tosheva@mmu.ac.uk) (L Tosheva)

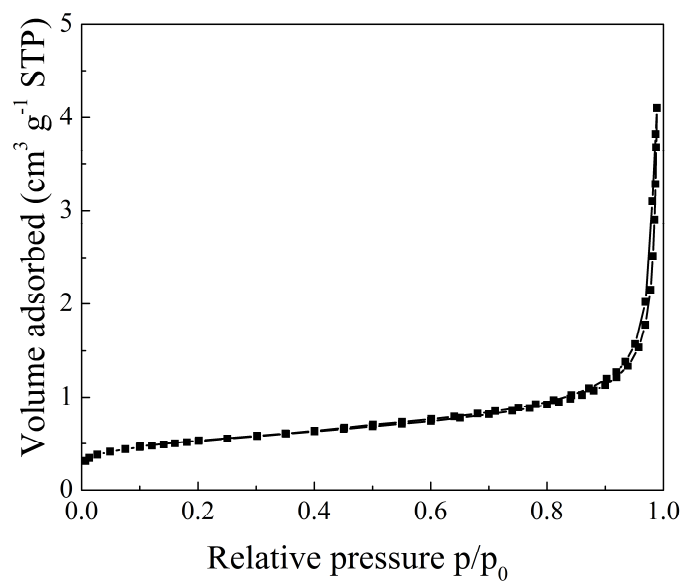

Figure S1. Nitrogen adsorption-desorption isotherm at -196 °C of fly ash.

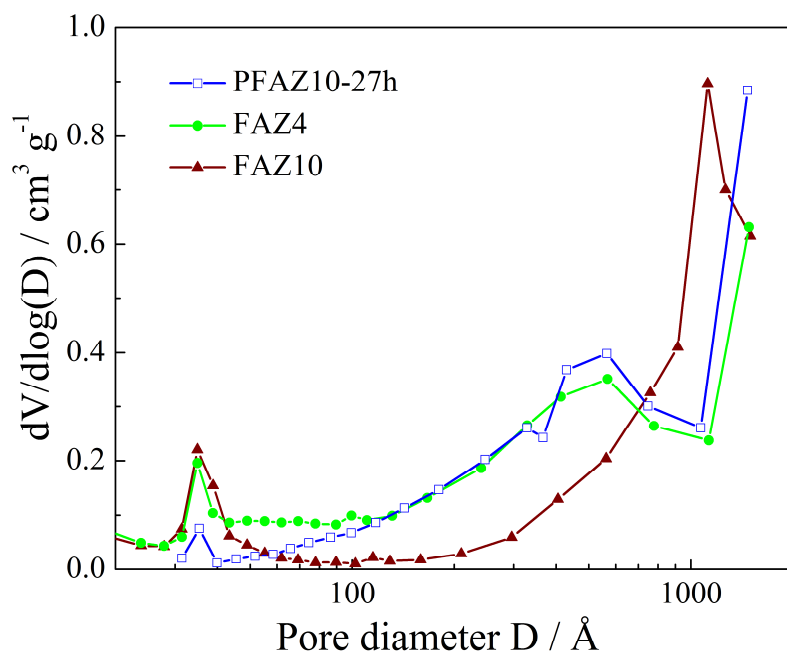

Figure S2. BJH desorption pore-size distribution plots of PFAZ10-27h, FAZ4 and FAZ10 samples.

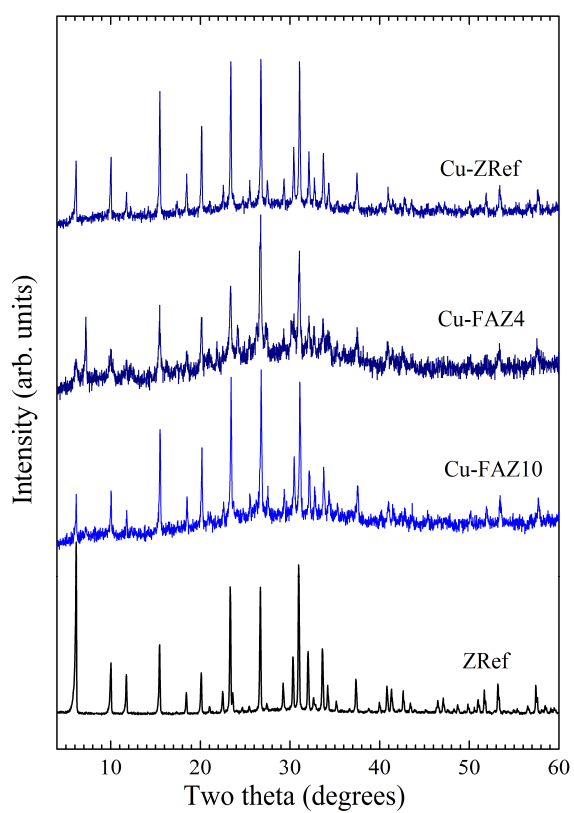

Figure S3. XRD patterns of ZRef, Cu-FAZ and Cu-ZRef samples. The XRD patterns were measured with a Philips X'Pert diffractometer (Bragg-Brentano geometry), using Cu  $K_{\alpha}$  radiation, a step size of  $0.02^{\circ}$  and an accumulation time of 2 s per step.

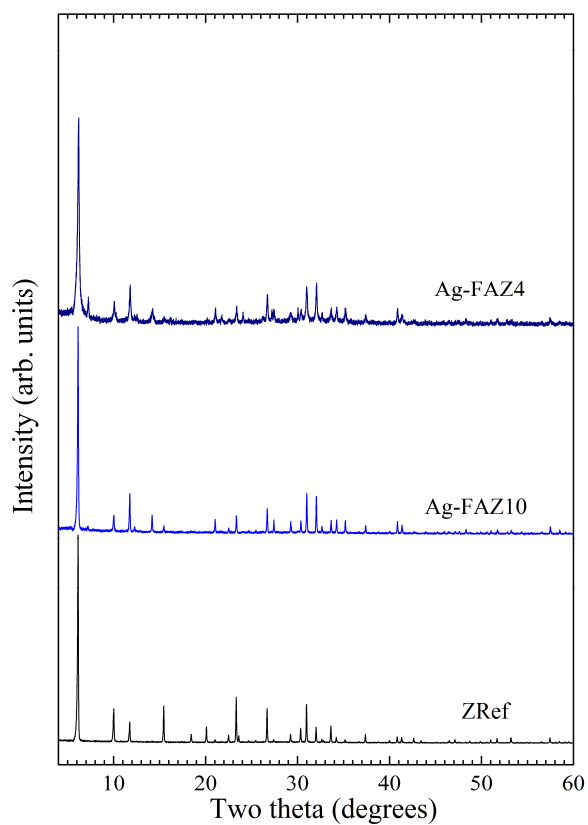

Figure S4. XRD patterns of ZRef, Ag-FAZ10 and Ag-FAZ10 samples. The XRD patterns were collected with a Stoe Automated Diffractometer – Multi-Purpose (STADI-MP), using Cu  $K_{\alpha}$  radiation, a step size of  $0.005^{\circ}$  and an accumulation time of 2 s per step.
